# Supplementary material
Source: PubMed Central journal article supplement (PMC7108588)
Supplement: c2ib20204b_1.pdf [file c2ib20204b_1.pdf]

**Table S1** All 373 compounds in the two herbs and the corresponding predicted OB

| Molecule      | Name                                                                                                                                                       | OB (%) |
|---------------|------------------------------------------------------------------------------------------------------------------------------------------------------------|--------|
| LM294*        | forsythidmethylester                                                                                                                                       | 100    |
| LM387*        | 7'-epi-8-hydroxypinoresinol                                                                                                                                | 94.8   |
| LM394*        | 1,7-dihydroxyxanthone                                                                                                                                      | 93.8   |
| LM289*        | (+)-pinoresinol monomethyl ether                                                                                                                           | 92.9   |
| LM285*        | egenine                                                                                                                                                    | 90.3   |
| LM298*        | matairesinol                                                                                                                                               | 89.6   |
| JM77*         | loniceracetalide A                                                                                                                                         | 89.4   |
| JM63*         | alpha-cedrol                                                                                                                                               | 89.3   |
| JM1*          | (-)-(3r,8s,9r,9as,10as)-9-ethenyl-8-(beta-d-glucopyranosyloxy)-2,3,9,9a,10,10a-hexahydro-5-oxo-5h,8h-pyrano[4,3-d]oxazolo[3,2-a]pyridine-3-carboxylic acid | 87.5   |
| JM200         | (z)-3-methyl-2-(2-pentenyl)-2-cyclopenten-1-one                                                                                                            | 87.1   |
| LM304*        | phillyrin                                                                                                                                                  | 85.1   |
| JM57*         | 7-epi-loganin                                                                                                                                              | 85.1   |
| JM173*/LM398* | camphol                                                                                                                                                    | 83.3   |
| LM287*        | epipinoresinol                                                                                                                                             | 82.8   |
| JM27          | 2-methyl-1-butanol                                                                                                                                         | 81.2   |
| LM356*        | (+)-lariciresinol                                                                                                                                          | 80.0   |
| JM170*        | ledol                                                                                                                                                      | 79.7   |
| LM430         | safynol                                                                                                                                                    | 78.3   |
| JM16          | 1-pentanol                                                                                                                                                 | 76.2   |
| LM414*        | campherenol                                                                                                                                                | 76.0   |
| LM386*        | 8-hydroxypinoresinol                                                                                                                                       | 75.9   |
| LM428*        | onjixanthone i                                                                                                                                             | 75.9   |
| LM345*        | (+)-phillygenin                                                                                                                                            | 74.4   |
| LM305*        | (+)-pinoresinol                                                                                                                                            | 74.1   |
| JM113*        | sweroside                                                                                                                                                  | 73.6   |
| JM107*        | secologanic acid                                                                                                                                           | 73.3   |
| JM13          | 1-hexen-3-one                                                                                                                                              | 72.3   |
| LM309*        | 3-ethyl-7hydroxyphthalide                                                                                                                                  | 70.5   |
| JM250*        | shuangkangsu                                                                                                                                               | 70.1   |
| LM274*        | astragalin                                                                                                                                                 | 68.6   |
| LM331         | 4-hydroxyphenylacetic acid                                                                                                                                 | 68.3   |
| LM299*        | (3r,4s,5r)-5-(3,4-dimethoxyphenyl)-3,4-bis(hydroxymethyl)dihydrofuran-2(3h)-one                                                                            | 67.5   |
| JM225*/LM399* | camphor                                                                                                                                                    | 67.4   |
| LM338*        | (-)-7'-o-methylegenine                                                                                                                                     | 67.1   |
| JM189         | trimethyl isothiazole                                                                                                                                      | 66.6   |
| JM29          | cis-2-penten-1-ol                                                                                                                                          | 66.4   |
| JM199         | cis-linalool oxide                                                                                                                                         | 66.2   |
| LM288         | erythritol                                                                                                                                                 | 65.8   |

|                   |                                                     |      |
|-------------------|-----------------------------------------------------|------|
| JM248*/<br>LM279* | caffeic acid                                        | 65.7 |
| JM217*            | bornyl acetate                                      | 65.5 |
| LM384*            | eugenol                                             | 65.4 |
| LM409*            | (+)-car-3-ene-2,5-dione                             | 64.2 |
| LM349*            | forsythoside d                                      | 63.7 |
| JM198             | cis-3-hex-en-1-ol                                   | 61.8 |
| LM306*            | (+)-pinoresinol monomethyl ether-4-d-beta-glucoside | 61.2 |
| JM74*             | ioniceracetalides b                                 | 61.2 |
| JM116*            | vogeloside                                          | 60.9 |
| LM273*            | (+)-isolariciresinol                                | 60.2 |
| JM14              | 1-hexene                                            | 60.0 |
| JM53*             | 3-hydroxy-2',4',7-trimethoxyflavone                 | 59.9 |
| JM140             | nerolidol                                           | 59.8 |
| JM201             | valeraldehyde                                       | 59.5 |
| JM130*            | dl-menthol                                          | 59.4 |
| JM249*            | quinic acid                                         | 59.2 |
| LM344*            | rengynic acid                                       | 57.6 |
| JM262*            | (e)-3-(3,4-dihydroxyphenyl)acrylic acid             | 55.9 |
| JM65*             | caeruloside c                                       | 55.6 |
| JM26              | o-tolunitrile                                       | 55.5 |
| LM358*            | adoxosidic acid                                     | 55.4 |
| LM424*            | matatabiether                                       | 55.3 |
| JM30              | 2-ethylfuran                                        | 54.2 |
| LM417             | delta-terpineol                                     | 53.9 |
| JM254             | (-)-dihydrocarveol                                  | 53.8 |
| JM108*            | secologanic dibutylacetal                           | 53.6 |
| JM40              | 3-(methylthio)propionaldehyde                       | 53.6 |
| LM363*            | rengyoxide                                          | 53.6 |
| JM205*            | alloaromadendrene                                   | 53.5 |
| JM251*            | loganic acid                                        | 53.4 |
| JM258*            | 3-caffeoylquinic acid methyl ester                  | 52.9 |
| LM374*            | cyclopseudo-hypericin                               | 52.5 |
| LM284*            | dimethylmatairesinol                                | 52.3 |
| JM111*/           | secologanoside 7-methylester                        | 51.4 |
| JM151*/<br>LM332* | linalool                                            | 51.2 |
| JM190*            | eriodictyol-7-o-glucoside                           | 51.0 |
| LM401*            | 2-pinen-10-ol                                       | 50.5 |
| JM202*            | aromadendrene                                       | 50.5 |
| JM43              | 3-penten-2-one                                      | 50.2 |
| LM431             | scopine                                             | 49.8 |
| JM136             | atractylodin                                        | 49.4 |

|                   |                                          |      |
|-------------------|------------------------------------------|------|
| JM25              | hex-2-enal                               | 49.2 |
| LM405             | sarfole                                  | 49.2 |
| JM178*/<br>LM377* | luteolin                                 | 49.0 |
| JM42              | 3-methyl-2-butenal                       | 48.9 |
| LM415             | cis-beta-terpineol                       | 48.8 |
| JM50              | 5-hydroxyl-3',4',5'7-teramethoxyl-ketone | 47.5 |
| JM105*/<br>LM310* | quercetin                                | 46.8 |
| LM407             | norlapachol                              | 46.6 |
| JM121*/<br>LM323* | $\alpha$ -pinene                         | 46.2 |
| JM210             | methyl linolenate                        | 46.2 |
| JM211             | ethyl linolenate                         | 46.1 |
| LM277             | bicuculline                              | 46.0 |
| JM139             | neryl acetate                            | 46.0 |
| JM152             | linalool oxide                           | 45.2 |
| JM90              | corymbosin                               | 44.9 |
| LM406/<br>JM118   | $\alpha$ -terpineol                      | 44.8 |
| LM322             | vanillic acid                            | 44.8 |
| JM237             | thymol                                   | 44.4 |
| LM389             | sabinene                                 | 44.4 |
| LM326             | $\beta$ -pinene                          | 44.3 |
| JM134             | phenethylalcohol                         | 44.3 |
| JM137             | (+)-longifolene                          | 44.2 |
| LM390             | 3-carene                                 | 44.2 |
| LM371*            | adhyperforin                             | 44.0 |
| LM370*            | hyperforin                               | 44.0 |
| JM240             | stigmasterol                             | 43.8 |
| JM203             | carvacrol                                | 43.7 |
| JM143             | eugenol                                  | 43.3 |
| JM47              | 4-hydroxycinnamic acid                   | 43.2 |
| JM172             | phytofluene                              | 43.2 |
| LM378             | kampferol                                | 43.1 |
| LM364*            | $\beta$ -amyrin acetate                  | 42.1 |
| LM382             | thymol                                   | 42.0 |
| JM213             | ethyl linoleate                          | 42.0 |
| JM59              | 8,11-octadecadienoic acid methyl ester   | 41.9 |
| JM212             | methyl linoleate                         | 41.9 |
| JM138             | nerol                                    | 41.5 |
| JM20              | 1,1-bicyclohexyl                         | 41.3 |
| LM400             | myrcenol                                 | 41.3 |

|                 |                                                        |      |
|-----------------|--------------------------------------------------------|------|
| LM423           | lactucasterol                                          | 41.0 |
| JM222           | 3,4-dihydroxybenzoic acid                              | 40.7 |
| JM185           | nonanoic acid                                          | 40.5 |
| LM412           | alpha-limonene                                         | 40.3 |
| LM266           | (20s)-dammar-24-ene-3 $\beta$ ,20-diol 3-acetate       | 40.2 |
| JM184           | 1-nonanal                                              | 40.2 |
| JM135           | phenylacetaldehyde                                     | 39.5 |
| LM381           | leucocyanidian                                         | 39.2 |
| JM22            | (e,e)-2,4-hexadienal                                   | 38.6 |
| JM165           | chrysoeriol                                            | 37.5 |
| JM35            | 3,4-dimethyl-2-hexanone                                | 37.3 |
| JM24            | trans-2-heptenal                                       | 37.2 |
| JM89/<br>LM325  | $\beta$ -sitosterol                                    | 36.9 |
| LM395           | quercetin-3-o-arabinoside                              | 36.0 |
| JM3             | (e)-2-methyl-2-btenoic acid, 2-methyl propyl ester     | 35.5 |
| JM168           | methyl caffeate                                        | 35.4 |
| JM169           | furfural                                               | 35.3 |
| JM233           | quinoline                                              | 35.3 |
| JM56            | 7,4'-di-o-methylapigenin                               | 35.1 |
| JM231/<br>LM388 | camphene                                               | 35.0 |
| JM126           | $\gamma$ -carotene                                     | 34.8 |
| LM276           | arctiin                                                | 34.4 |
| JM232           | indole                                                 | 34.4 |
| JM154           | decanoic acid                                          | 34.0 |
| LM422           | i-linalool                                             | 33.6 |
| JM259           | 5-caffeoylquinic acid methyl ester                     | 33.6 |
| JM120           | $\alpha$ -cubebene                                     | 33.5 |
| JM204           | citronellol                                            | 33.5 |
| JM7             | (6cis-2trans) farnesol                                 | 33.2 |
| LM397           | alpha-terpinene                                        | 33.2 |
| LM319           | 3 $\beta$ -acetyl-2,25-epoxydammarane-24 $\alpha$ -ol  | 33.1 |
| LM330           | 3 $\beta$ -acetyl-2,25-epoxydammarane-24 $\beta$ -ol   | 33.1 |
| LM410           | 3 $\beta$ -acetyl-20,25-epoxydammarane-24 $\alpha$ -ol | 33.1 |
| LM411           | 3 $\beta$ -acetyl-20,25-epoxydammarane-24 $\beta$ -ol  | 33.1 |
| JM38            | cephrol                                                | 32.9 |
| JM132           | benzaldehyde                                           | 32.6 |
| JM39            | 3-(3,4-dihydroxyphenyl)propanoic acid                  | 32.2 |
| JM67            | caryophyllene oxide                                    | 31.8 |
| JM216           | (-)-alpha-copaene                                      | 31.4 |
| JM123           | $\beta$ -cubebene                                      | 31.4 |
| JM150           | trans-trans-farnesol                                   | 30.8 |

|       |                                                         |      |
|-------|---------------------------------------------------------|------|
| JM21  | 2,5-dimethylpyrazine                                    | 30.8 |
| JM52  | 5-hydroxyl-4',7-dimethpxyl-ketone                       | 30.8 |
| JM115 | loganic                                                 | 30.7 |
| LM403 | myrcene                                                 | 30.7 |
| LM315 | suspenolic acid                                         | 30.7 |
| JM60  | 9,12-octadecadienoic acid                               | 30.5 |
| JM122 | $\beta$ -caryophyllene                                  | 30.3 |
| JM234 | elemol                                                  | 30.3 |
| JM51  | 5-hydroxyl-3',4',7-trimethoxyl-ketone                   | 30.2 |
| JM45  | 4-hydroxybenzoic acid                                   | 30.2 |
| JM6   | (2cis-6trans)farnesol                                   | 30.0 |
| JM11  | 1-(2,6-dihydroxy-4-methyphenyl)-ethanone                | 29.6 |
| JM197 | caryophyllene                                           | 29.4 |
| JM114 | tricin                                                  | 29.3 |
| JM145 | hydroquinone                                            | 29.3 |
| JM146 | bicyclogermacrene                                       | 28.9 |
| LM402 | p-cymene                                                | 27.5 |
| LM355 | (-)-matairesinoside                                     | 27.3 |
| LM404 | matairesinoside                                         | 27.3 |
| JM252 | secologanoside                                          | 26.9 |
| LM348 | acteoside                                               | 26.6 |
| JM54  | 6-methyl-5-hepten-2-one                                 | 25.9 |
| LM281 | (+)-pinoresinol-4-0-beta-d-glucoside                    | 25.6 |
| LM286 | (+)-epipinoresinol-4'-o-d-glucoside                     | 25.6 |
| LM291 | forsythenside b                                         | 25.1 |
| JM83  | succinic acid                                           | 24.9 |
| JM31  | 2-isopropenyl-5-methylhex-4-enal                        | 24.6 |
| JM18  | 1-ethenyl-1-methyl-2,4-bis(1-methylethenyl)-cyclohexane | 24.5 |
| LM372 | protopseudohypericin                                    | 24.4 |
| LM383 | $\alpha$ -caryophyllene                                 | 24.3 |
| JM125 | $\beta$ -elemene                                        | 24.0 |
| JM206 | geraniol                                                | 23.9 |
| LM334 | $\beta$ -d-glucopyranosiduronic acid                    | 23.7 |
| JM61  | methyl-9-methyl tetradecanoate                          | 23.6 |
| JM79  | loniceroside                                            | 23.6 |
| JM110 | secologanin                                             | 23.6 |
| JM128 | $\gamma$ -elemene                                       | 23.6 |
| JM48  | methyl 4-hydroxycinnamate                               | 23.1 |
| JM8   | 1,2,4-phloroglucinol                                    | 22.9 |
| JM223 | dodecanoic acid                                         | 22.7 |
| JM4   | (e,e)-3,7,11-trimethyl-2,6,10-dodecatrien-1-yl          | 22.6 |
| LM290 | forsythenside a                                         | 21.9 |
| LM408 | geranial                                                | 21.9 |

|                |                                                                          |      |
|----------------|--------------------------------------------------------------------------|------|
| JM72           | germacrene d                                                             | 21.6 |
| JM127          | $\gamma$ -muurolene                                                      | 21.5 |
| JM221          | guaiol                                                                   | 21.5 |
| JM187          | 1-tridecanecarboxylic acid                                               | 21.2 |
| JM17           | capryl alcohol                                                           | 21.1 |
| JM71           | dehydroxymorroniside                                                     | 20.7 |
| JM156          | alexandrin                                                               | 20.6 |
| LM335          | daucoesterol                                                             | 20.6 |
| LM376          | emodin anthrone                                                          | 20.5 |
| JM19           | 12-methyl-tridecanoic acid, methyl ester                                 | 20.3 |
| LM413          | beta-trans-ocimene                                                       | 20.1 |
| JM183          | apigenin                                                                 | 20.0 |
| JM163          | hexanal                                                                  | 19.6 |
| JM             | (+)-epi-bicyclosesquiphellandrene                                        | 19.4 |
| JM88           | (s,1e,6e)-8-isopropyl-1-methyl-5-methylenecyclodeca-1,6-diene            | 19.4 |
| JM102          | palmitic acid                                                            | 19.3 |
| JM192          | 1-pentadecanecarboxylic acid                                             | 19.3 |
| JM229          | acidepalmitique                                                          | 19.3 |
| LM302          | palmitic acid                                                            | 19.3 |
| JM230          | ethylpalmitater                                                          | 19.0 |
| JM162          | inositol                                                                 | 18.9 |
| JM87           | (+)- $\alpha$ -mullolene                                                 | 18.8 |
| JM133          | benzylbenzoate                                                           | 18.5 |
| LM421          | geraniin                                                                 | 18.3 |
| JM228          | rhodoxanthin                                                             | 18.3 |
| LM359          | salidroside                                                              | 18.3 |
| LM329          | betulonic acid                                                           | 18.3 |
| JM119          | $\alpha$ -muurolene                                                      | 18.2 |
| JM193          | methyl hexadecanoate                                                     | 18.1 |
| LM342          | rengyolone                                                               | 18.0 |
| JM188          | methyl tetradecanoate                                                    | 17.9 |
| JM220          | zeaxanthin                                                               | 17.8 |
| JM191          | dodecane                                                                 | 17.7 |
| JM2            | 1s-cis)-1,2,3,5,6,8a-hexahydro-4,7-dimethyl-1-(1-mthylethyl)-naphthalene | 17.7 |
| LM313          | succinic acid                                                            | 17.7 |
| LM368          | pseudo-hypericin                                                         | 17.1 |
| LM433          | terinen-4-ol                                                             | 16.8 |
| JM82/<br>LM301 | oleanolic acid                                                           | 16.7 |
| JM207          | octanoic acid                                                            | 16.4 |
| JM70           | d-glucose                                                                | 16.2 |
| JM23           | 2-(octadecyloxy)-ethanol                                                 | 16.2 |
| JM196          | tetradecane                                                              | 15.9 |

|                 |                                                               |      |
|-----------------|---------------------------------------------------------------|------|
| JM124           | $\beta$ -eudesmol                                             | 15.4 |
| LM312           | stearic acid                                                  | 15.4 |
| JM209/<br>LM321 | uraolic acid                                                  | 15.2 |
| LM369           | hypericin                                                     | 15.2 |
| JM94            | lignoceric acid                                               | 14.9 |
| JM46            | 4-octadecylmorpholine                                         | 14.8 |
| JM41            | cis-jasmone                                                   | 14.6 |
| JM101           | ochnaflavone                                                  | 14.4 |
| LM425           | myricadiol                                                    | 14.2 |
| LM314           | suspenol                                                      | 14.1 |
| LM365           | quercitrin                                                    | 14.1 |
| JM195           | myristic acid                                                 | 13.6 |
| LM341           | rengyoside c                                                  | 13.6 |
| LM373           | protohypericin                                                | 12.9 |
| JM194           | heptadecyloxirane                                             | 12.4 |
| LM362           | rengyol                                                       | 12.1 |
| JM76            | isochlorogenic acid                                           | 11.9 |
| LM350           | forsythoside e                                                | 11.9 |
| JM164           | farnesylacetone                                               | 11.9 |
| LM426           | octacosanedioic acid                                          | 11.7 |
| JM253           | 8-epiloganin                                                  | 11.7 |
| JM73            | hederagenin                                                   | 11.6 |
| JM84            | ursolic acid                                                  | 11.4 |
| JM129           | ginnol                                                        | 11.3 |
| LM283           | cornoside                                                     | 10.7 |
| LM292           | forsythialan b                                                | 10.7 |
| JM241           | 3-caffeoylquinic acid                                         | 10.6 |
| JM243           | 5-caffeoylquinic acid                                         | 10.6 |
| JM148           | nonacosanyl alcohol                                           | 10.6 |
| LM361           | isorengyol                                                    | 10.5 |
| JM242           | 4-caffeoylquinic acid                                         | 10.5 |
| JM5             | (e,e,e)-3,7-11,16-tetramethyl hexadeca-2,6,10,14-tetraen-1-ol | 10.1 |
| JM175           | methyl chlorogenate                                           | 10.0 |
| JM261           | 3-caffeoylquinic acid ethyl ester                             | 9.9  |
| JM91            | cosmosiin                                                     | 9.7  |
| LM432           | sutchuenensine iv                                             | 9.7  |
| JM32            | (s)-phenethyl 2-bromopropanoate                               | 9.1  |
| JM86            | zingiberene                                                   | 8.9  |
| JM117           | $\alpha$ -hederin                                             | 8.9  |
| JM33            | 2-bromododecane                                               | 8.8  |
| JM49            | 5-o-caffeoyl quinic acid butyl ester                          | 8.8  |
| LM343           | rengynic acid-1'-o- $\beta$ -d-glucoside                      | 8.7  |

|                 |                            |     |
|-----------------|----------------------------|-----|
| JM227           | phytantriol                | 8.5 |
| JM149           | heptacosane                | 8.2 |
| LM380           | amentoflavone              | 8.1 |
| JM68            | centauroside               | 8.1 |
| LM300           | n-hentriacontane           | 8.1 |
| LM267           | arctigenin                 | 8.1 |
| LM427           | onjisaponin g              | 7.9 |
| LM336           | forsythinol                | 7.8 |
| LM282           | cedrusin                   | 7.8 |
| LM293           | forsythide                 | 7.7 |
| LM270           | iso-bauerenyl acetate      | 7.7 |
| LM340           | rengyoside b               | 7.6 |
| LM379           | myricetin                  | 7.6 |
| JM55            | (e)-beta-farnesene         | 7.5 |
| LM333           | (-)-olivil                 | 7.4 |
| LM385           | olivil                     | 7.4 |
| JM214           | rhoifolin                  | 6.7 |
| JM208           | neohederagenin f           | 6.7 |
| JM161           | macranthoidin b            | 6.6 |
| JM224           | saponin                    | 6.5 |
| JM180           | cynaroside                 | 6.4 |
| JM166/<br>LM367 | hyperoside                 | 6.3 |
| JM219           | cryptoxanthin              | 6.2 |
| JM109           | secologanin dimethylacetal | 6.0 |
| JM99            | madreselvin a              | 6.0 |
| LM311           | secoisolariciresinol       | 6.0 |
| JM92            | dinethylsecologanoside     | 5.7 |
| JM15            | 1-pentadecene              | 5.6 |
| JM176           | loganin                    | 4.9 |
| JM28            | 2-methylpentadecane        | 4.4 |
| JM58            | 7-epi-vogeloside           | 4.3 |
| LM391           | (-)-pinoresinol            | 4.3 |
| LM296           | isoquercetin               | 4.2 |
| LM366           | isoquercitrin              | 4.2 |
| JM160           | macranthoidin a            | 4.2 |
| LM420           | gamma-camphorene           | 3.9 |
| JM186           | lonicerin                  | 3.8 |
| JM10            | 1,6-dicyclohexylhexane     | 3.6 |
| LM434           | urushio III                | 3.6 |
| JM62            | akebia saponin d           | 3.6 |
| LM347           | forsythoside c             | 3.4 |
| LM317           | suspensaside b             | 3.4 |



|                 |                                         |     |
|-----------------|-----------------------------------------|-----|
| JM112           | secoxyloganin                           | 3.3 |
| JM144           | stigmasterol 3-o-beta-d-glucoside       | 3.3 |
| LM352           | forsythoside g                          | 3.3 |
| LM351           | forsythoside f                          | 3.3 |
| LM324           | $\beta$ -hydroxyacteoside               | 3.3 |
| LM418           | forsythoside b                          | 3.3 |
| JM179           | sapindoside b                           | 3.3 |
| JM158           | fulvotomentoside a                      | 3.2 |
| JM174/<br>LM354 | rutin                                   | 3.2 |
| LM346           | forsythoside a                          | 3.0 |
| JM159           | stragalin                               | 3.0 |
| JM100           | madreselvin b                           | 3.0 |
| LM416           | cyanuricoside a                         | 3.0 |
| LM375           | procyanidin                             | 3.0 |
| JM260           | 3,4,5-tricaffeoylquinic acid            | 3.0 |
| LM339           | rengyoside A                            | 2.9 |
| LM316           | suspensaside A                          | 2.9 |
| JM141           | disacoside B                            | 2.1 |
| JM155           | hydnocarpin                             | 2.1 |
| JM85            | xylostosidine                           | 1.9 |
| JM104           | quercetin-3-o-beta-d-glu                | 1.8 |
| JM75            | isochlorogenic acid C                   | 1.8 |
| JM246           | 3,5-dicaffeoylquinic acid               | 1.7 |
| JM256           | 3,5-dicaffeoylquinic acid methyl ester. | 1.7 |
| JM247           | 4,5-dicaffeoylquinic acid               | 1.7 |
| JM257           | 4,5-dicaffeoylquinic acid methyl ester. | 1.7 |
| JM245           | 3,4-dicaffeoylquinic acid               | 1.7 |
| JM255           | 3,4-dicaffeoylquinic acid methyl ester. | 1.7 |
| LM280           | caleolarioside A                        | 1.6 |
| LM307           | plantainoside A                         | 1.6 |

LM represents the molecule of *Fructus Forsythiae*, JM represents the molecule of *Lonicera japonica*, \*the candidate molecules for target prediction.

**Table S2** The information of all 248 protein targets.

| Gene Name | Protein Name                                     | Origin |
|-----------|--------------------------------------------------|--------|
| UL54*     | DNA polymerase                                   | virus  |
| HN*       | Hemagglutinin-neuraminidase                      | virus  |
| E*        | Lysozyme                                         | virus  |
| NA*       | Neuraminidase                                    | virus  |
| TK*       | Thymidine kinase                                 | virus  |
| HTR1B*    | 5-hydroxytryptamine 1B receptor                  | human  |
| HTR1D*    | 5-hydroxytryptamine 1D receptor                  | human  |
| HTR1F*    | 5-hydroxytryptamine 1F receptor                  | human  |
| HTR2A*    | 5-hydroxytryptamine 2A receptor                  | human  |
| HTR2B*    | 5-hydroxytryptamine 2B receptor                  | human  |
| HTR7*     | 5-hydroxytryptamine 7 receptor                   | human  |
| ADORA2A*  | Adenosine A2a receptor                           | human  |
| ALOX5*    | Arachidonate 5-lipoxygenase                      | human  |
| ADRB2*    | Beta-2 adrenergic receptor                       | human  |
| ampC*     | Beta-lactamase                                   | human  |
| PDE4B*    | cAMP-specific 3',5'-cyclic phosphodiesterase 4B  | human  |
| CTSK*     | Cathepsin K                                      | human  |
| CDK2*     | Cell division protein kinase 2                   | human  |
| PDE3A*    | cGMP-inhibited 3',5'-cyclic phosphodiesterase A  | human  |
| DRD1*     | D(1B) dopamine receptor                          | human  |
| DRD2*     | D(2) dopamine receptor                           | human  |
| DRD3*     | D(3) dopamine receptor                           | human  |
| DRD4*     | D(4) dopamine receptor                           | human  |
| CALY*     | D1 dopamine receptor-interacting protein calycon | human  |
| OPRD1*    | Delta-type opioid receptor                       | human  |
| folA*     | Dihydrofolate reductase                          | human  |
| DHODH*    | Dihydroorotate dehydrogenase, mitochondrial      | human  |
| TOP2A*    | DNA topoisomerase 2-alpha                        | human  |
| EGFR*     | Epidermal growth factor receptor                 | human  |
| GRIN3A*   | Glutamate [NMDA] receptor subunit 3A             | human  |
| GSK3B*    | Glycogen synthase kinase-3 beta                  | human  |
| HRH1*     | Histamine H1 receptor                            | human  |
| OPRK1*    | Kappa-type opioid receptor                       | human  |
| LCT*      | Lactase-phlorizin hydrolase                      | human  |
| LTA4H*    | Leukotriene A-4 hydrolase                        | human  |
| MIF*      | Macrophage migration inhibitory factor           | human  |
| AOC3*     | Membrane copper amine oxidase                    | human  |
| MAPK14*   | Mitogen-activated protein kinase 14              | human  |
| MAPK8*    | Mitogen-activated protein kinase 8               | human  |
| NOS1*     | Nitric-oxide synthase, brain                     | human  |
| PPARG*    | Peroxisome proliferator-activated receptor gamma | human  |

|          |                                                           |                |
|----------|-----------------------------------------------------------|----------------|
| PLA2G1B* | Phospholipase A2                                          | human          |
| PTGS2*   | Prostaglandin G/H synthase 2                              | human          |
| deoD*    | Purine nucleoside phosphorylase                           | human          |
| TLR7*    | Toll-like receptor 7                                      | human          |
| PRSS1*   | Trypsin-1                                                 | human          |
| TNF*     | Tumor necrosis factor                                     | human          |
| CACNA1H* | Voltage-dependent T-type calcium channel subunit alpha-1H | human          |
| PTGS1    | Prostaglandin G/H synthase 1                              | human          |
| SCN5A    | Sodium channel protein type 5 subunit alpha               | human          |
| ESR1     | Estrogen receptor                                         | human          |
| ADRA2A   | Alpha-2A adrenergic receptor                              | human          |
| HTR3A    | 5-hydroxytryptamine 3 receptor                            | human          |
| PDE4D    | cAMP-specific 3',5'-cyclic phosphodiesterase 4D           | human          |
| ADRA2C   | Alpha-2C adrenergic receptor                              | human          |
| CHRM1    | Muscarinic acetylcholine receptor M1                      | human          |
| HTR1A    | 5-hydroxytryptamine 1A receptor                           | human          |
| ESR2     | Estrogen receptor beta                                    | human          |
| GABRA4   | Gamma-aminobutyric-acid receptor subunit alpha-4          | human          |
| ACHE     | Acetylcholinesterase                                      | human          |
| GABRA5   | Gamma-aminobutyric-acid receptor subunit alpha-5          | human          |
| CHRM3    | Muscarinic acetylcholine receptor M3                      | human          |
| KCNH2    | Potassium voltage-gated channel subfamily H member 2      | human          |
| PDE4A    | cAMP-specific 3',5'-cyclic phosphodiesterase 4A           | human          |
| ADRA2B   | Alpha-2B adrenergic receptor                              | human          |
| ADRB1    | Beta-1 adrenergic receptor                                | human          |
| CA2      | Carbonic anhydrase 2                                      | human          |
| CACNA1C  | Voltage-dependent L-type calcium channel subunit alpha-1C | human          |
| ADRA1A   | Alpha-1A adrenergic receptor                              | human          |
| SLC6A4   | Sodium-dependent serotonin transporter                    | human          |
| GABRA1   | Gamma-aminobutyric-acid receptor subunit alpha-1          | human          |
| DRD1     | D(1A) dopamine receptor                                   | human          |
| ADRA1D   | Alpha-1D adrenergic receptor                              | human          |
| F2       | Prothrombin                                               | human          |
| GABRA2   | Gamma-aminobutyric-acid receptor subunit alpha-2          | human          |
| ADRA1B   | Alpha-1B adrenergic receptor                              | human          |
| CHRM5    | Muscarinic acetylcholine receptor M5                      | human          |
| HTR2C    | 5-hydroxytryptamine 2C receptor                           | human          |
| gag-pol  | Gag-Pol polyprotein                                       | other organism |
| NOS2     | Nitric oxide synthase, inducible                          | human          |
| DPP4     | Dipeptidyl peptidase 4                                    | human          |
| OPRM1    | Mu-type opioid receptor                                   | human          |
| MAPK10   | Mitogen-activated protein kinase 10                       | human          |
| GABRB1   | Gamma-aminobutyric-acid receptor subunit beta-1           | human          |

|          |                                                                                |       |
|----------|--------------------------------------------------------------------------------|-------|
| GABRQ    | Gamma-aminobutyric acid receptor subunit theta                                 | human |
| GABRD    | Gamma-aminobutyric acid receptor subunit delta                                 | human |
| CACNA1S  | Voltage-dependent L-type calcium channel subunit alpha-1S                      | human |
| GABRG2   | Gamma-aminobutyric acid receptor subunit gamma-2                               | human |
| CALM1    | Calmodulin                                                                     | human |
| SLC6A2   | Sodium-dependent noradrenaline transporter                                     | human |
| HSP90AA1 | Heat shock protein HSP 90-alpha                                                | human |
| HTR1E    | 5-hydroxytryptamine 1E receptor                                                | human |
| GABRP    | Gamma-aminobutyric acid receptor subunit pi                                    | human |
| GABRA6   | Gamma-aminobutyric-acid receptor subunit alpha-6                               | human |
| PDPK1    | 3-phosphoinositide-dependent protein kinase 1                                  | human |
| BACE1    | Beta-secretase 1                                                               | human |
| GABRB2   | Gamma-aminobutyric-acid receptor subunit beta-2                                | human |
| GABRE    | Gamma-aminobutyric acid receptor subunit epsilon                               | human |
| ACE      | Angiotensin-converting enzyme                                                  | human |
| GABRR3   | Gamma-aminobutyric acid receptor subunit rho-3                                 | human |
| KCNH7    | Potassium voltage-gated channel subfamily H member 7                           | human |
| CSNK2A1  | Casein kinase II subunit alpha                                                 | human |
| SLC6A3   | Sodium-dependent dopamine transporter                                          | human |
| CCNA2    | Cyclin-A2                                                                      | human |
| HTR4     | 5-hydroxytryptamine 4 receptor                                                 | human |
| THRB     | Thyroid hormone receptor beta-1                                                | human |
| GABRB3   | Gamma-aminobutyric-acid receptor subunit beta-3                                | human |
| GABRR2   | Gamma-aminobutyric acid receptor subunit rho-2                                 | human |
| GABRA3   | Gamma-aminobutyric-acid receptor subunit alpha-3                               | human |
| PLAU     | Urokinase-type plasminogen activator                                           | human |
| GABRG1   | Gamma-aminobutyric acid receptor subunit gamma-1                               | human |
| CHEK1    | Serine/threonine-protein kinase Chk1                                           | human |
| GABRR1   | Gamma-aminobutyric-acid receptor subunit rho-1                                 | human |
| TSPO     | Translocator protein                                                           | human |
| CACNA1D  | Voltage-dependent L-type calcium channel subunit alpha-1D                      | human |
| F8       | Coagulation factor VII                                                         | human |
| CACNA1G  | Voltage-dependent T-type calcium channel subunit alpha-1G                      | human |
| PYGM     | Glycogen phosphorylase, muscle form                                            | human |
| VKORC1   | Vitamin K epoxide reductase complex subunit 1                                  | human |
| HSP90AB1 | Heat shock protein HSP 90-beta                                                 | human |
| PIK3CG   | Phosphatidylinositol-4,5-bisphosphate 3-kinase catalytic subunit gamma isoform | human |
| KDR      | Vascular endothelial growth factor receptor 2                                  | human |
| AKR1B1   | Aldose reductase                                                               | human |
| ADA      | Adenosine deaminase                                                            | human |
| PLA2G2A  | Phospholipase A2, membrane associated                                          | human |
| PTPN1    | Tyrosine-protein phosphatase non-receptor type 1                               | human |

|         |                                                       |                |
|---------|-------------------------------------------------------|----------------|
| RXRA    | Retinoic acid receptor RXR-alpha                      | human          |
| KIF11   | Kinesin-like protein KIF11                            | human          |
| PPARA   | Peroxisome proliferator-activated receptor alpha      | human          |
| AR      | Androgen receptor                                     | human          |
| PIM1    | Proto-oncogene serine/threonine-protein kinase Pim-1  | human          |
| IGHG1   | Ig gamma-1 chain C region                             | human          |
| GABRG3  | Gamma-aminobutyric acid receptor subunit gamma-3      | human          |
| SOAT1   | Sterol O-acyltransferase 1                            | human          |
| eltB    | Heat-labile enterotoxin B chain                       | other organism |
| ERG11   | Cytochrome P450 51                                    | other organism |
| MAPK1   | Mitogen-activated protein kinase 1                    | human          |
| HPGDS   | Glutathione-requiring prostaglandin D synthase        | human          |
| CHRM2   | Muscarinic acetylcholine receptor M2                  | human          |
| NOS3    | Nitric-oxide synthase, endothelial                    | human          |
| CA4     | Carbonic anhydrase 4                                  | human          |
| HBB     | Hemoglobin subunit beta                               | human          |
| CHRM4   | Muscarinic acetylcholine receptor M4                  | human          |
| CA1     | Carbonic anhydrase 1                                  | human          |
| CHRNA4  | Neuronal acetylcholine receptor subunit alpha-4       | human          |
| PNMT    | Phenylethanolamine N-methyltransferase                | human          |
| CHRNA7  | Neuronal acetylcholine receptor subunit alpha-7       | human          |
| NQO2    | Ribosyldihyronicotinamide dehydrogenase [quinone]     | human          |
| MAOA    | Amine oxidase [flavin-containing] A                   | human          |
| IGKC    | Ig kappa chain C region                               | human          |
| tgt     | Queuine tRNA-ribosyltransferase                       | other organism |
| SCN10A  | Sodium channel protein type 10 subunit alpha          | human          |
| PLA2G2E | Group IIE secretory phospholipase A2                  | human          |
| SRC     | Proto-oncogene tyrosine-protein kinase Src            | human          |
| CTRB1   | Chymotrypsinogen B                                    | human          |
| KCNMA1  | Calcium-activated potassium channel subunit alpha 1   | human          |
| GRIK2   | Glutamate receptor, ionotropic kainate 2              | human          |
| HDAC8   | Histone deacetylase 8                                 | human          |
| SCN1A   | Sodium channel protein type 1 subunit alpha           | human          |
| PARP1   | Poly [ADP-ribose] polymerase 1                        | human          |
| HBA1    | Hemoglobin subunit alpha                              | human          |
| MAOB    | Amine oxidase [flavin-containing] B                   | human          |
| PRKACA  | cAMP-dependent protein kinase catalytic subunit alpha | human          |
| ADRB3   | Beta-3 adrenergic receptor                            | human          |
| ACHE    | Cholinesterase                                        | human          |
| CYP2A6  | Cytochrome P450 2A6                                   | human          |
| SLC18A2 | Synaptic vesicular amine transporter                  | human          |
| KCNJ11  | ATP-sensitive inward rectifier potassium channel 11   | human          |
| HRH2    | Histamine H2 receptor                                 | human          |

|              |                                                                        |                |
|--------------|------------------------------------------------------------------------|----------------|
| ABCC8        | ATP-binding cassette transporter sub-family C member 8                 | human          |
| ADORA1       | Adenosine A1 receptor                                                  | human          |
| GRIN2A       | Glutamate [NMDA] receptor subunit epsilon-1                            | human          |
| cobT         | Nicotinate-nucleotide--dimethylbenzimidazole phosphoribosyltransferase | other organism |
| inhA         | Enoyl-[acyl-carrier-protein] reductase [NADH]                          | other organism |
| GRIA2        | Glutamate receptor 2                                                   | human          |
| HNMT         | Histamine N-methyltransferase                                          | human          |
| xynY         | Endo-1,4-beta-xylanase Y                                               | other organism |
| TMP1         | Thymidylate synthase                                                   | other organism |
| SLC12A1      | Solute carrier family 12 member 1                                      | human          |
| PDE5A        | cGMP-specific 3',5'-cyclic phosphodiesterase                           | human          |
| DHFRL1       | Dihydrofolate reductase-like protein 1                                 | human          |
| ABL1         | Proto-oncogene tyrosine-protein kinase ABL1                            | human          |
| KIT          | Mast/stem cell growth factor receptor                                  | human          |
| CACNB4       | Voltage-dependent L-type calcium channel subunit beta-4                | human          |
| CDK2deltaT   | D-HSCDK2                                                               | human          |
| folB         | Dihydroneopterin aldolase                                              | other organism |
| NCOA2        | Nuclear receptor coactivator 2                                         | human          |
| accC         | Biotin carboxylase                                                     | other organism |
| Streptavidin | Streptavidin                                                           | other organism |
| F13A1        | Coagulation factor X                                                   | human          |
| CDK5         | Cell division protein kinase 5                                         | human          |
| MAPK8IP1     | C-jun-amino-terminal kinase-interacting protein 1                      | human          |
| PDE10A       | cAMP and cAMP-inhibited cGMP 3',5'-cyclic phosphodiesterase 10A        | human          |
| MAPKAPK2     | MAP kinase-activated protein kinase 2                                  | human          |
| NQO1         | NAD(P)H dehydrogenase [quinone] 1                                      | human          |
| WEE1         | Wee1-like protein kinase                                               | human          |
| LCK          | Proto-oncogene tyrosine-protein kinase LCK                             | human          |
| camC         | Cytochrome P450-cam                                                    | other organism |
| CHRNA2       | Neuronal acetylcholine receptor subunit alpha-2                        | human          |
| PGR          | Progesterone receptor                                                  | human          |
| NR3C2        | Mineralocorticoid receptor                                             | human          |
| RNASE1       | Ribonuclease pancreatic                                                | human          |
| gyrA         | DNA gyrase subunit A                                                   | other organism |
| MET          | Hepatocyte growth factor receptor                                      | human          |
| rpmF         | 50S ribosomal protein L32                                              | other organism |
| npr          | Thermolysin                                                            | other organism |
| nprS         | Bacillolysins                                                          | other organism |
| REN          | Renin                                                                  | human          |
| tyrB         | Aromatic-amino-acid aminotransferase                                   | other organism |
| TYR          | Tyrosinase                                                             | human          |
| TH           | Tyrosine 3-monooxygenase                                               | human          |
| aauA         | Aralkylamine dehydrogenase light chain                                 | other organism |

|             |                                                                  |                |
|-------------|------------------------------------------------------------------|----------------|
| CTSB        | Cathepsin B                                                      | human          |
| MAN2A1      | Alpha-mannosidase 2                                              | human          |
| PAH         | Phenylalanine-4-hydroxylase                                      | human          |
| CGTase      | Cyclomaltodextrin glucanotransferase                             | other organism |
| GRIN2B      | Glutamate [NMDA] receptor subunit epsilon-2                      | human          |
| CHRN4       | Neuronal acetylcholine receptor subunit beta-4                   | human          |
| chiB        | Chitinase B                                                      | other organism |
| NCOA1       | Nuclear receptor coactivator 1                                   | human          |
| GRIN1       | Glutamate [NMDA] receptor subunit zeta-1                         | human          |
| fabZ        | (3R)-hydroxymyristoyl-acyl carrier protein dehydratase           | other organism |
| LCN9        | Epididymal-specific lipocalin-9                                  | human          |
| NR3C1       | Glucocorticoid receptor                                          | human          |
| NR112       | Orphan nuclear receptor PXR                                      | human          |
| HAO1        | Hydroxyacid oxidase 1                                            | human          |
| DAO         | D-amino-acid oxidase                                             | human          |
| CELA1       | Chymotrypsin-like elastase family member 1                       | human          |
| ATP1A1      | Sodium/potassium-transporting ATPase alpha-1 chain               | human          |
| ACACB       | Acetyl-CoA carboxylase 2                                         | human          |
| CHRNA3      | Neuronal acetylcholine receptor subunit alpha-3                  | human          |
| PDE4C       | cAMP-specific 3',5'-cyclic phosphodiesterase 4C                  | human          |
| ADH1C       | Alcohol dehydrogenase 1C                                         | human          |
| ADH1A       | Alcohol dehydrogenase 1A                                         | human          |
| SAP2        | Candidapepsin-2                                                  | other organism |
| ADH1B       | Alcohol dehydrogenase 1B                                         | human          |
| ce15A       | Endoglucanase 5A                                                 | other organism |
| ce1CCF      | Endoglucanase F                                                  | other organism |
| TRPM8       | Transient receptor potential cation channel subfamily M member 8 | human          |
| RHO         | Rhodopsin                                                        | human          |
| CES1        | Liver carboxylesterase 1                                         | human          |
| blaCTX-M-9a | Beta-lactamase CTX-M-9a                                          | other organism |
| AOC3        | Copper amine oxidase                                             | human          |
| PYGL        | Glycogen phosphorylase, liver form                               | human          |
| XDH         | Xanthine dehydrogenase/oxidase                                   | human          |
| MMP13       | Collagenase 3                                                    | human          |
| pufC        | Photosynthetic reaction center cytochrome c subunit              | other organism |
| gag-pol     | Pol polyprotein                                                  | other organism |

\*the targets associated with influenza.
